# Supplementary material for: Xanthomonas axonopodis pv. eucalyptorum pv. nov. Causing Bacterial Leaf Blight on Eucalypt in Brazil
Source: PubMed Central journal article supplement — Plant Pathol J. 2018 Aug 1;34(4):269–85. doi: 10.5423/PPJ.OA.01.2018.0014 (PMC6097821; doi:10.5423/ppj.oa.01.2018.0014), 2018-08-01
Supplement: ppj-34-269_suppl.pdf [file ppj-34-269_suppl.pdf]

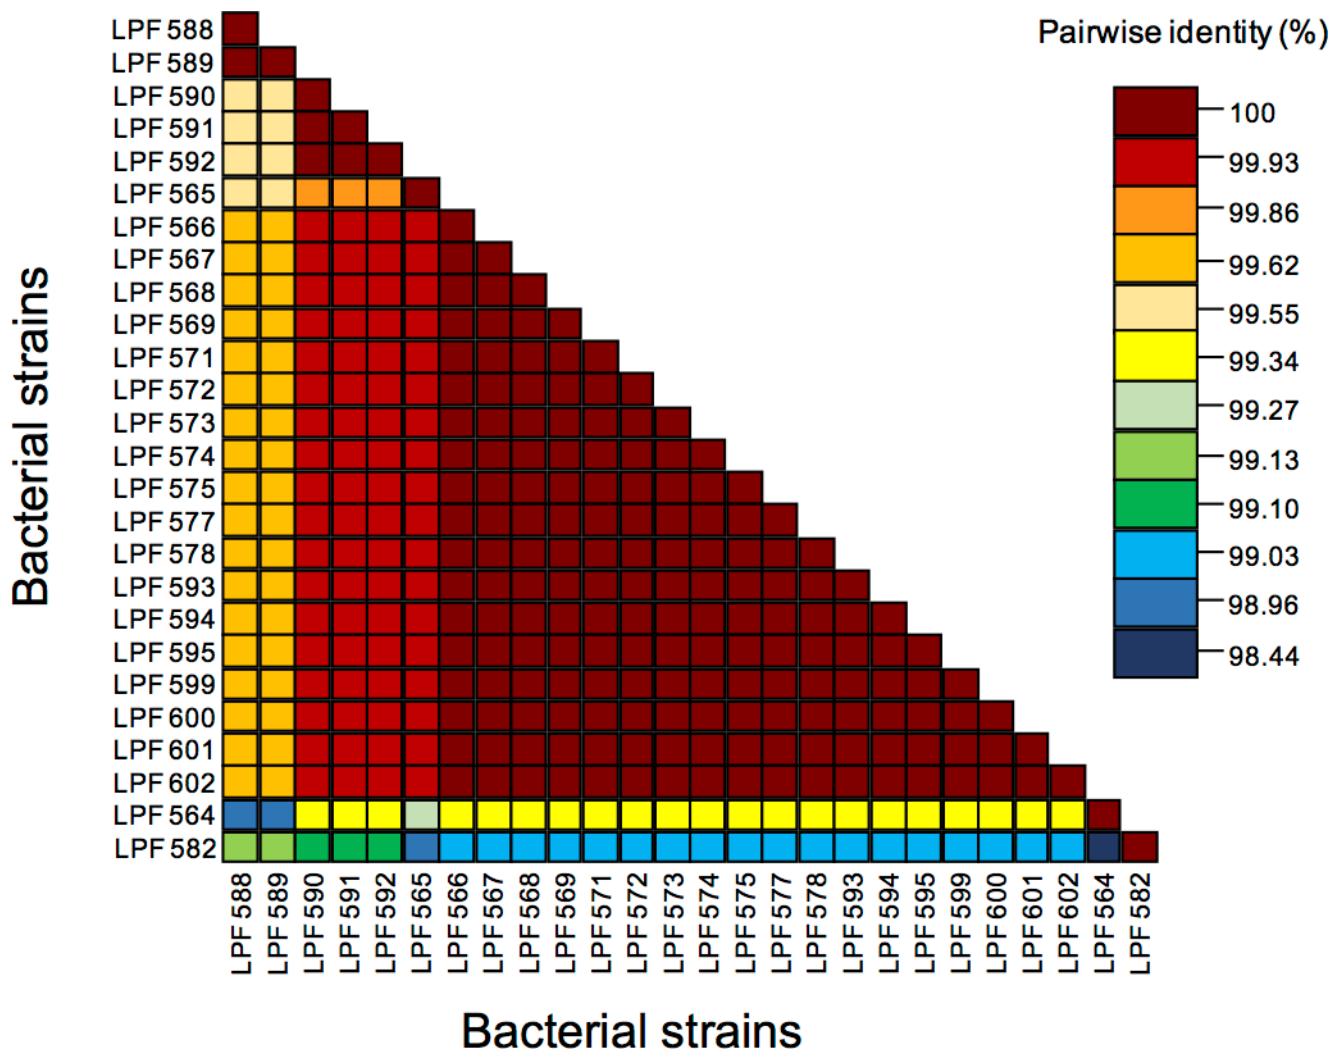

**Supplementary Fig. 1.** Similarity matrix of concatenated *dnaK*, *fyuA*, *gyrB* e *rpoD* nucleotide sequences of *Xanthomonas axonopodis* isolates that cause bacterial leaf blight symptoms on eucalypt plants obtained in this study. The matrix was generated using a 2886-bp concatenated nucleotide sequence with the software SDT v1.2.
